# Supplementary material for: A photometric study of chemically peculiar stars with the STEREO satellites – II. Non-magnetic chemically peculiar stars★
Source: Oxford University Press journal article supplement (doi:10.1093/mnras/sts318), 2012-12-03
Supplement: sts318_Supplementary_Data.zip [file sts318_Supplementary_Data.zip]

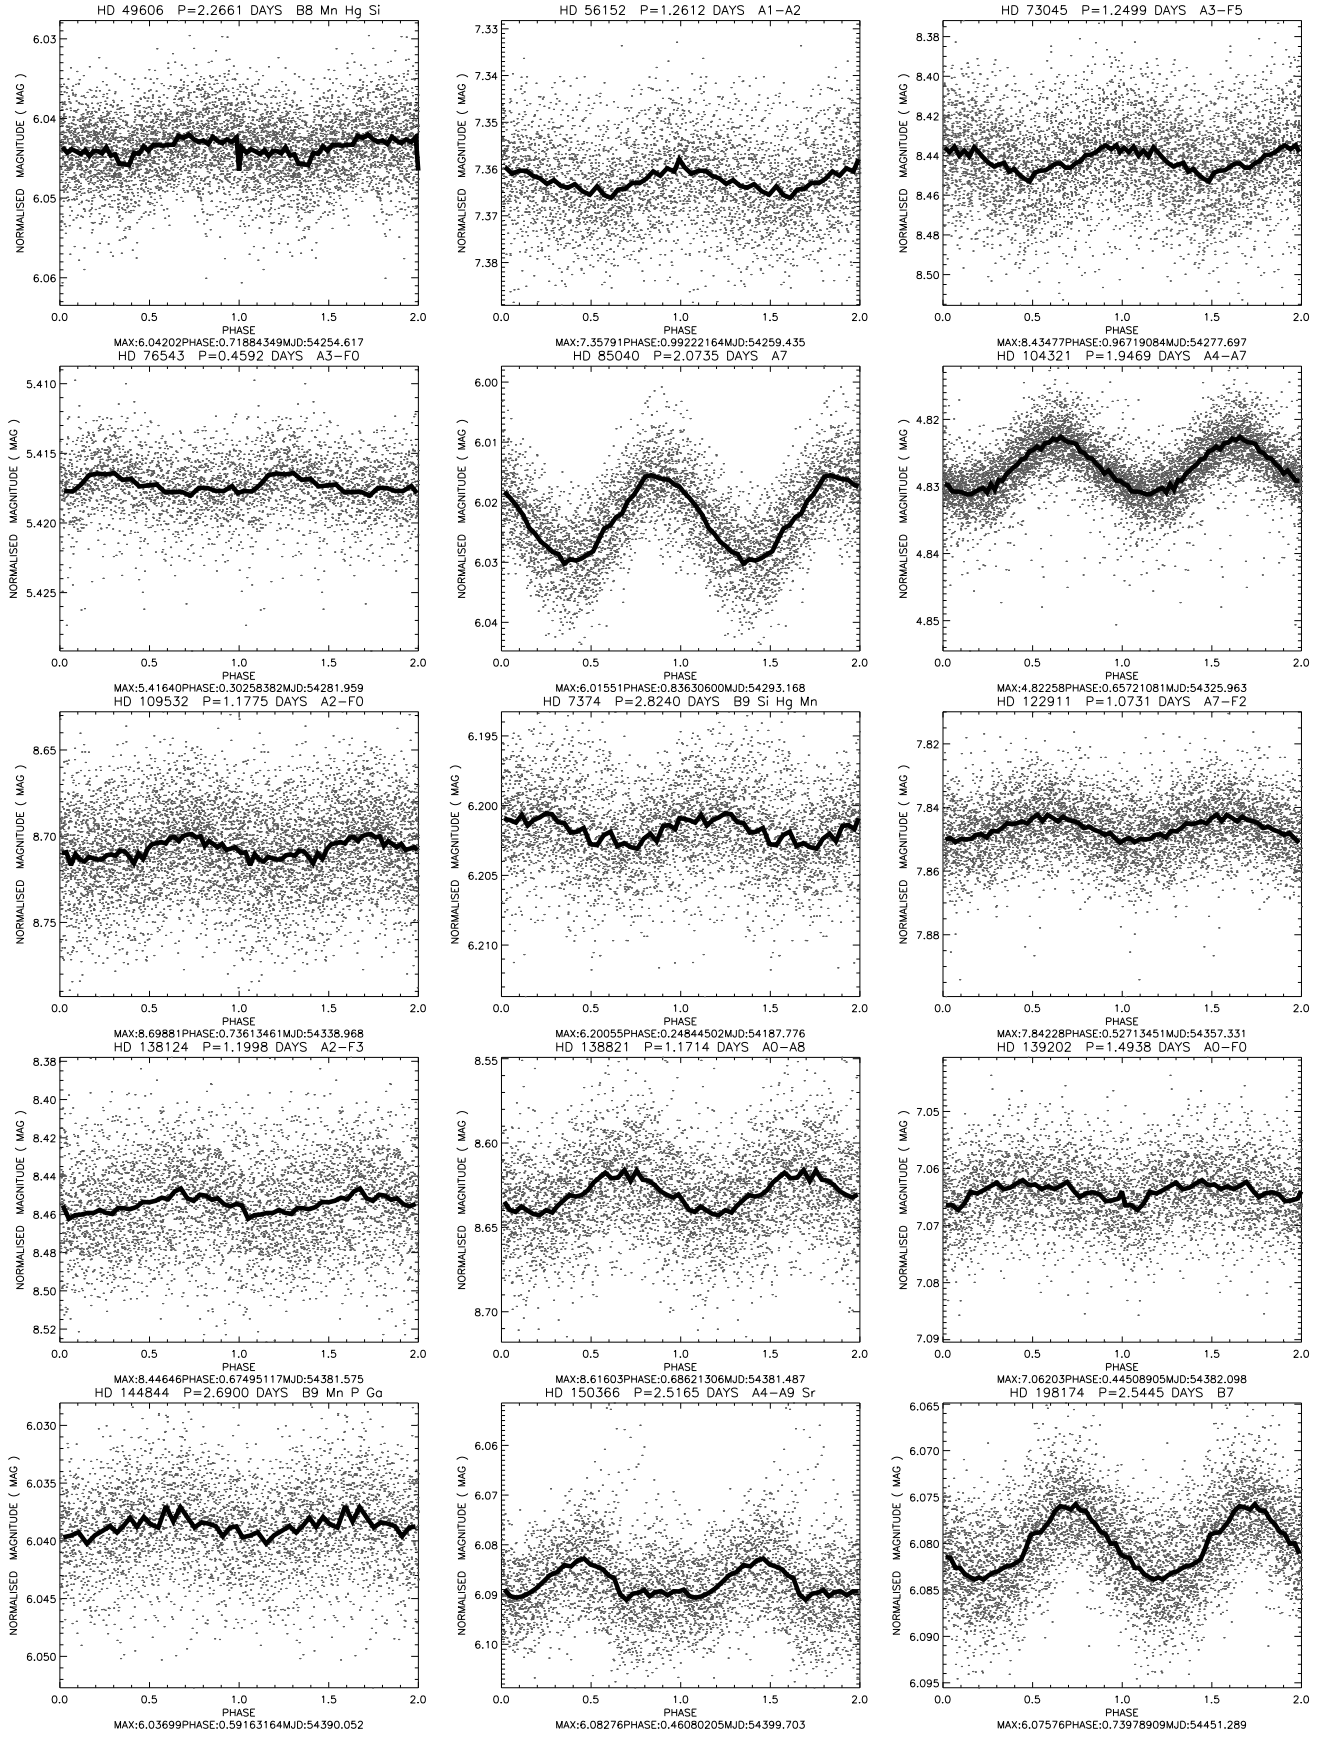

Figure 7: Periodograms obtained for the CP1/3 stars, listed in Table 3.

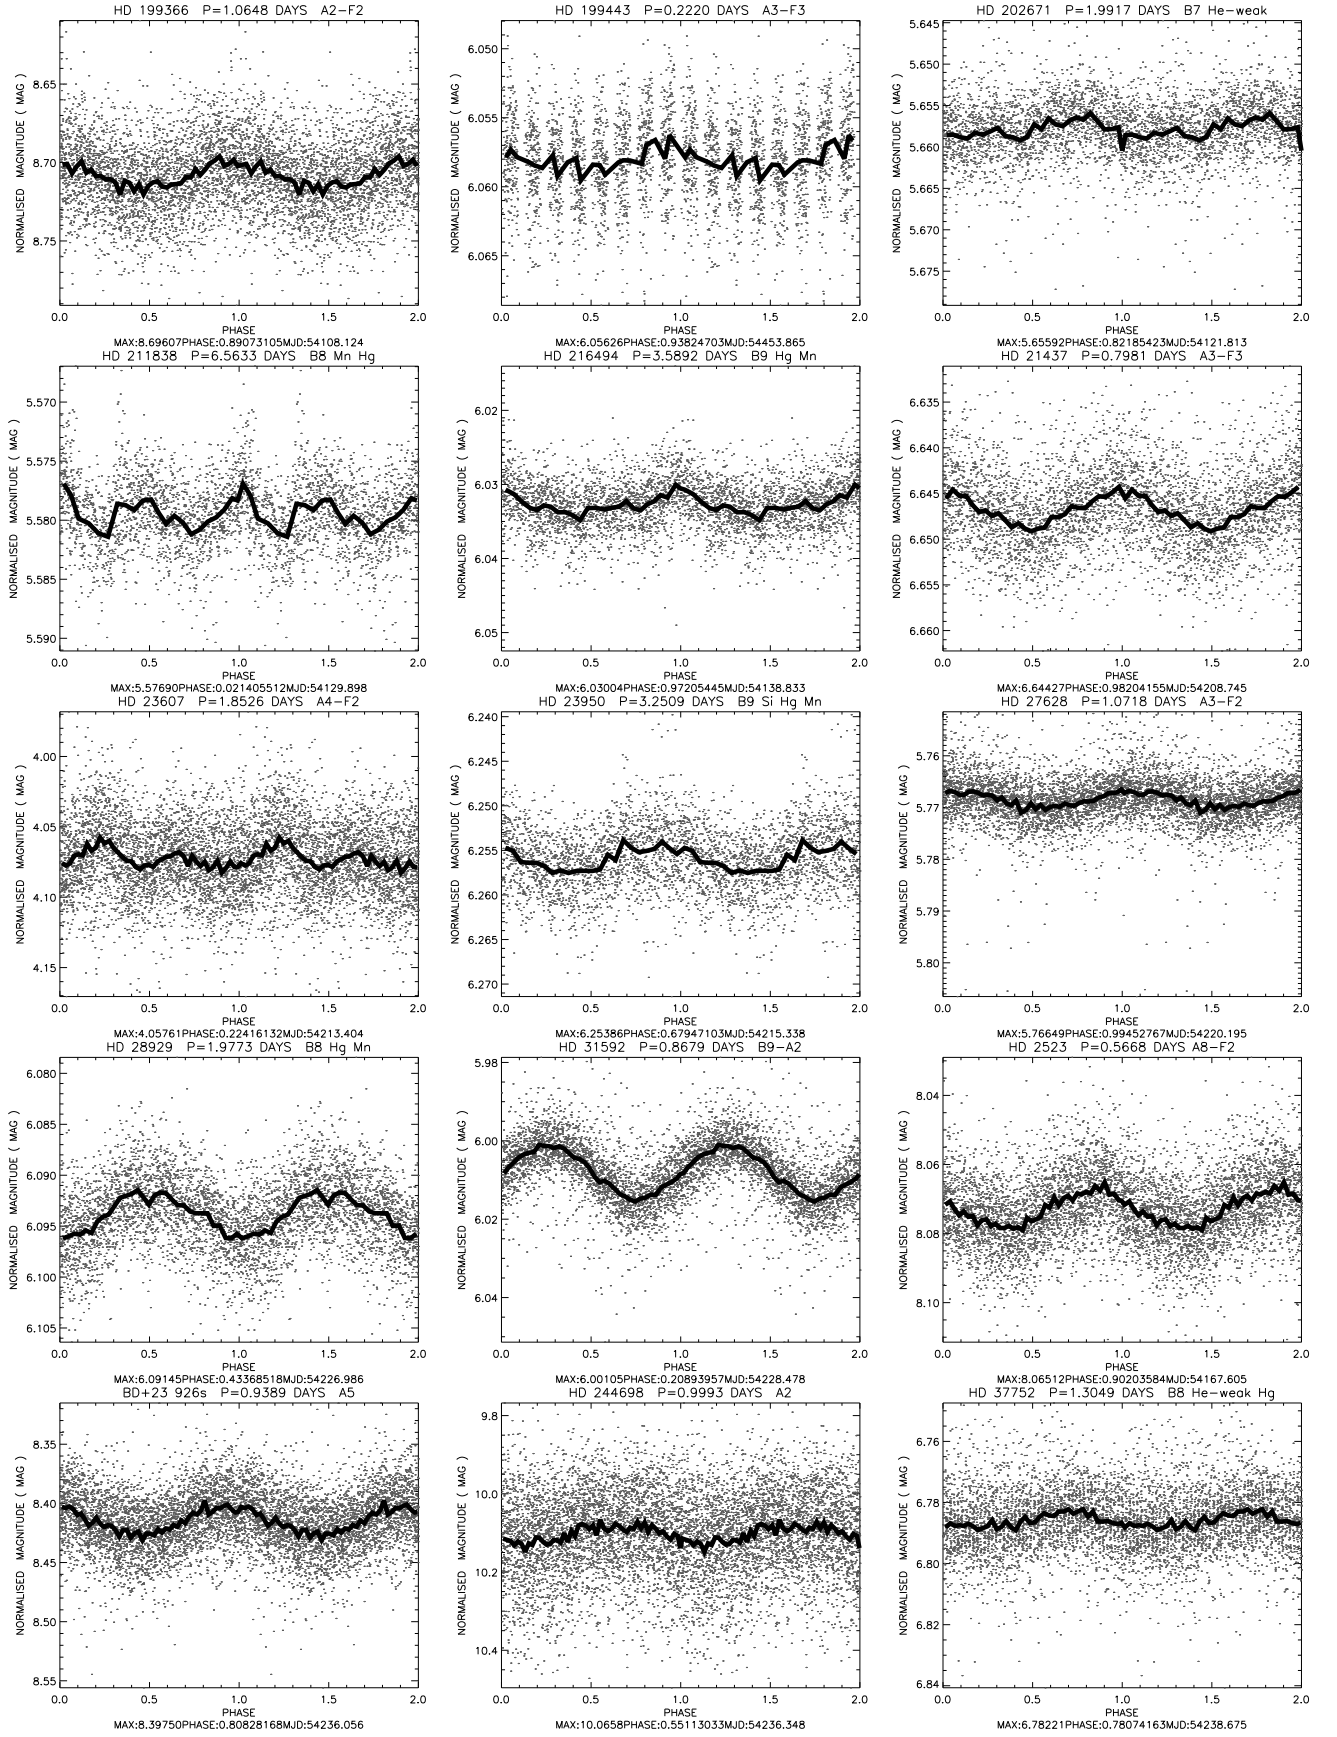

Figure 7: continued.

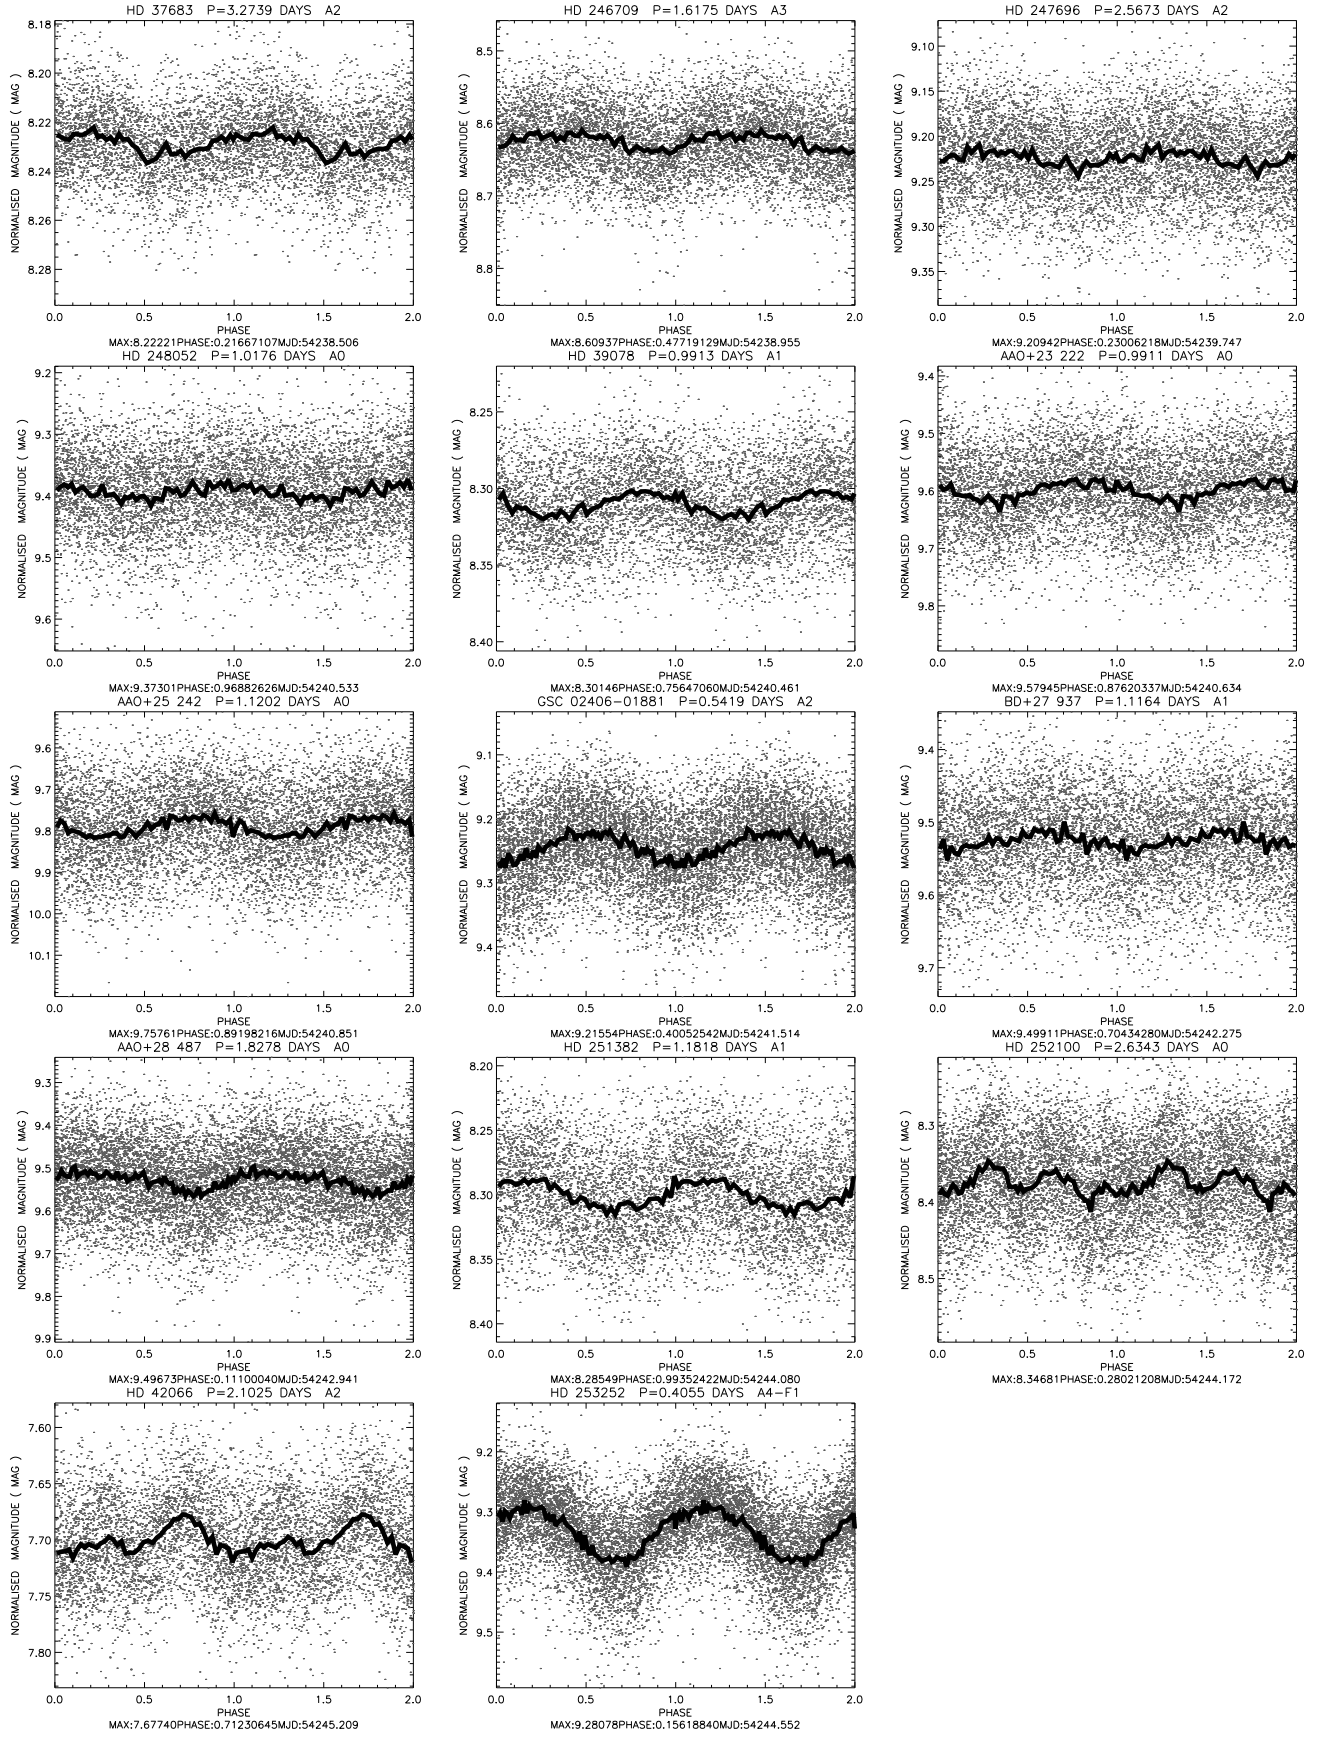

Figure 7: continued.
