# Supplementary material for: A photometric study of chemically peculiar stars with the STEREO satellites – II. Non-magnetic chemically peculiar stars★
Source: Oxford University Press journal article supplement (doi:10.1093/mnras/sts318), 2012-12-03
Supplement: sts318_Supplementary_Data.zip [file sts318_Supplementary_Data.zip]

Archive with 5 entries (5 files):
- figure6.pdf
- figure7.pdf
- table3.txt
- table1.txt
- table2.txt
