# Supplementary material for: A photometric study of chemically peculiar stars with the STEREO satellites – II. Non-magnetic chemically peculiar stars★
Source: Oxford University Press journal article supplement (doi:10.1093/mnras/sts318), 2012-12-03
Supplement: sts318_Supplementary_Data.zip [file sts318_Supplementary_Data.zip › table1.txt]

HD 294	20	1.91666	1.09421	8.25	A0,NA	CP1
HD 1169	230	4.02257	8.11554	7.60	A8-F2,NA	CP1
HD 3644	985	9.78988	-3.99267	8.91	A0-A7,NA	CP1
HD 4570	1230	11.91140	-4.49765	9.34	A2-F1,NA	CP1
HD 11386	2850	28.01060	10.81060	7.70	A7-F2,NA	CP1
HD 11636	2970	28.66000	20.80800	2.64	A4,NA	CP1	71.6(4.0/4)
HD 12869	3280	31.64140	22.64830	5.03	A1-A7,NA	CP1	15.0(7.1/2)
HD 13248	3440	32.44400	13.17580	7.72	A0,NA	CP1
HD 14688	3680	35.63830	16.87030	6.79	A0,NA	CP1	55.0(8.3/1)
HD 15385	3870	37.30700	23.46900	6.19	A5-F1,NA	CP1	22.8(5.8/3)
HD 16956	4310	40.92120	21.14710	7.79	A2-F0,Sr	CP1
HD 17094	4320	41.23560	10.11410	4.20	F0-F2,NA	CP1	48.3(3.0/4)
HD 17317	4360	41.86680	21.34530	8.62	A5-F0,NA	CP1
HD 18769	4690	45.47560	26.46240	5.91	A2-A9,NA	CP1	46.5(7.1/2)
HD 19963	4940	48.22670	11.13260	7.96	A0,NA	CP1
HD 21933	5520	53.14980	9.37344	5.75	B8,Hg,Mn	CP3?	90.0(8.5/2)
HD 22538	5730	54.54560	19.36040	7.71	A3-F0,NA	CP1
HD 22615	5760	54.75020	20.91580	6.49	A3-A8,NA	CP1	29.0(5.7/2)
HD 22767	5810	55.08980	21.40570	7.20	A0-F0,NA	CP1
HD 23194	5890	56.00110	24.55700	8.07	A4-A7,NA	CP1	20.0(3.0/1)
HD 23610	6053	56.84540	22.92210	8.20	A0,NA	CP1
HD 23631	6060	56.85170	23.91470	7.30	A0-A3,NA	CP1	20.0(3.0/1)
HD 23791	6087	57.18290	23.25980	8.38	A7-F0,NA	CP1?	85.0(12.8/1)
HD 26063	6620	62.08600	19.73760	7.74	A3-A7,NA	CP1
HD 27749	7110	65.85440	16.77730	5.63	A1-F4,NA	CP1	13.3(0.8/4)
HD 27962	7160	66.37200	17.92840	4.31	A1-A4,NA	CP1	14.6(0.4/5)
HD 28226	7200	67.00330	21.61990	5.71	A4-F2,NA	CP1	91.5(9.5/2)
HD 28355	7270	67.20900	13.04760	5.01	A5-F1,NA	CP1	99.0(7.1/2)
HD 28527	7324	67.64010	16.19400	4.77	A5-F0,NA	CP1?	72.5(7.4/2)
HD 28546	7340	67.66200	15.69190	5.46	A5-F2,NA	CP1	30.9(1.6/3)
HD 29193	7480	69.14460	19.76000	7.35	A3-F2,NA	CP1
HD 29479	7550	69.78840	15.79990	5.08	A3-A9,NA	CP1	56.5(7.1/2)
HD 29589	7600	70.01420	12.19760	5.44	B8,Hg,Mn	CP3	70.0(7.4/2)
HD 30453	7860	72.32950	32.58820	5.83	A6-F2,NA	CP1	16.0(9.7/4)
HD 31373	8040	73.95900	15.04030	5.78	B8,Hg,Mn	CP3	85.0(7.4/2)
HD 32448	8260	75.97200	15.65250	10.02	A2,NA	CP1?
HD 32428	8240	76.15380	32.32030	6.62	A4-F0,NA	CP1	71.5(7.1/2)
HD 32642	8330	76.38380	19.80670	6.44	A5,NA	CP1	54.0(7.1/2)
HD 33959	8660	78.85160	32.68760	5.00	A6-F0,dD	CP1?	24.5(1.3/5)
HD 34384	8750	79.56410	28.78000	7.29	A3-F4,NA	CP1
HD 242351	8762	79.65120	33.06520	11.20	A0,NA	CP1?
AAO+23 10	8868	80.16820	23.57990	11.39	A0,NA	CP1?
HD 242717	8862	80.25450	32.08940	10.50	A3,NA	CP1?
HD 242775	8875	80.32650	30.75600	10.80	A0,NA	CP1?
HD 34876	8909	80.52730	32.74530	9.50	A0,NA	CP1?
HD 242938	8932	80.62620	29.26350	9.49	A5,NA	CP1?
HD 35035	8950	80.75590	28.46890	7.56	A3-F2,NA	CP1
HD 243008	8956	80.77540	28.85380	10.20	A5,NA	CP1?
HD 243093	8972	80.92450	32.11390	9.71	A5,NA	CP1?
HD 243112	8974	80.93100	30.37200	10.40	A2,NA	CP1?
HD 243222	8984	81.05510	26.75710	9.88	A3,NA	CP1?
HD 35236	8988	81.19980	33.34660	9.22	A2,NA	CP1?
HD 243279	8999	81.20610	31.02560	11.80	A2,NA	CP1?
HD 243309	9008	81.25280	29.95720	9.91	A2,NA	CP1?
HD 243392	9035	81.33700	30.37340	11.60	A3-F,NA	CP1?
HD 243394	9049	81.35990	29.64240	10.28	A5,NA	CP1?
HD 243483	9062	81.45890	27.46280	10.40	A5,NA	CP1?
HD 243428	9061	81.46640	31.45120	11.80	A0,NA	CP1?
HD 243407	9063	81.48110	33.10750	10.60	A1,NA	CP1?
HD 243479	9072	81.53800	32.14700	10.60	A0,NA	CP1?
HD 35497	9110	81.57300	28.60750	1.68	B8,Cr,Mn	CP3?	66.3(5.2/3)
HD 35531	9144	81.72470	32.54750	9.24	A2,NA	CP1?
HD 243643	9165	81.76320	30.80280	10.80	A0,NA	CP1?
HD 243665	9175	81.80590	30.76040	10.80	B8,NA	CP1?
HD 243745	9208	81.93350	30.95720	11.10	A1,NA	CP1?
HD 35654	9204	81.94090	32.04780	9.34	A2,NA	CP1?
HD 243848	9233	82.00130	26.01770	10.50	A3,NA	CP1?
HD 243860	9235	82.09630	32.79620	10.60	A0,NA	CP1?
HD 243875	9237	82.11310	30.28780	11.60	A2,NA	CP1?
HD 243991	9248	82.25330	27.83730	10.40	A0,NA	CP1?
AAO+24 48	9265	82.29360	24.64510	11.28	A2,NA	CP1?
HD 244020	9262	82.36610	32.50770	10.50	A7,NA	CP1?
HD 244045	9263	82.37810	31.96150	10.60	A0,NA	CP1?
HD 244118	9271	82.46430	28.93220	10.60	A0,NA	CP1?
AAO+29 97	9269	82.46930	29.74360	11.89	A3,NA	CP1?
HD 244112	9267	82.49640	32.75890	10.70	A0,NA	CP1?
HD 244278	9339	82.65200	24.81670	9.63	A1,NA	CP1?
HD 244237	9331	82.66770	31.34610	11.90	A3,NA	CP1?
AAO+29 109	9343	82.72760	29.24570	10.90	A0,NA	CP1?
AAO+23 47	9349	82.76480	23.86910	11.19	A3,NA	CP1?
AAO+24 53	9352	82.78490	24.62590	11.20	A2,NA	CP1?
HD 244307	9346	82.79540	30.06030	11.80	A2,NA	CP1?
HD 244327	9347	82.79870	30.41970	11.20	A5-F,NA	CP1?
HD 244394	9356	82.86360	27.48870	10.60	A1,NA	CP1?
AAO+27 66	9372	83.00230	27.94600	11.64	A0,NA	CP1?
HD 244665	9428	83.23000	23.42550	10.43	A1,NA	CP1?
HD 244597	9413	83.24630	33.37890	11.40	A5-F,NA	CP1?
AAO+28 103	9425	83.25170	28.38010	11.38	A0,NA	CP1?
HD 244641	9426	83.29070	31.11010	10.20	A0,NA	CP1?
HD 244708	9456	83.36130	29.23570	9.88	A2,NA	CP1?
HD 36484	9430	83.36420	32.80120	6.47	A1-A7,NA	CP1
HD 36589	9520	83.41180	20.47420	6.18	B7,NA	CP3	95.0(9.5/2)
HD 244810	9534	83.57260	31.52330	10.40	A3,NA	CP1?
HD 244917	9565	83.64190	27.15080	10.70	A5,NA	CP1?
HD 36681	9581	83.71980	31.63570	9.48	A2,NA	CP1?
HD 244937	9585	83.72600	30.05770	9.85	A0,NA	CP1?
HD 244936	9595	83.75480	31.39320	10.31	A0,NA	CP1?
HD 245156	9665	83.91040	23.07790	10.80	A2,NA	CP1?
HD 245063	9653	83.94640	32.54240	9.86	A3,NA	CP1?
HD 245290	9796	84.11080	24.16830	9.86	A2,NA	CP1?
HD 245303	9812	84.19530	33.21500	10.70	A3,NA	CP1?
HD 245357	9855	84.21320	24.27750	10.30	A0,NA	CP1?
HD 245398	9863	84.25060	24.14450	10.50	A3,NA	CP1?
HD 245422	9895	84.35110	28.06150	11.00	A0,NA	CP1?
HD 245444	9905	84.37460	28.38600	10.40	A2,NA	CP1?
HD 245602	9956	84.53310	27.80230	10.00	A0,NA	CP1?
HD 245707	9996	84.70940	30.64360	10.80	A1,NA	CP1?
HD 245806	10018	84.87340	33.27330	10.70	A3,NA	CP1?
AAO+26 125	10045	84.90100	26.04490	11.39	A1,NA	CP1?
HD 245972	10055	85.02260	30.23620	9.67	A2,NA	CP1?
HD 37519	10100	85.14960	31.35820	6.03	B8,Hg	CP3?	225.0(20.7/2)
HD 246315	10172	85.42110	24.29630	9.44	A4,NA	CP1?
AAO+24 144	10176	85.48130	24.96590	11.66	A1,NA	CP1?
AAO+27 132	10206	85.61270	27.04380	11.19	A5,NA	CP1?
HD 246437	10204	85.67200	31.97580	10.19	A0,NA	CP1?
HD 246511	10215	85.70360	30.50170	10.90	A1,NA	CP1?
HD 246561	10217	85.71470	29.13490	10.70	A3,NA	CP1?
HD 246557	10223	85.79600	32.28320	9.35	A2,NA	CP1?
HD 246688	10229	85.82750	25.18350	10.74	A1,NA	CP1?
HD 246645	10228	85.86110	28.36260	11.30	A0,NA	CP1?
HD 246618	10225	85.86940	33.28450	9.60	A5,NA	CP1?
HD 246640	10226	85.88960	32.76820	11.00	A0,NA	CP1?
HD 38032	10237	86.04900	33.10010	7.76	A2,NA	CP1?
HD 246858	10242	86.15760	32.29790	11.30	A5,NA	CP1?
HD 38162	10255	86.21030	25.75770	8.31	A0,NA	CP1
HD 247081	10301	86.34130	27.16140	10.40	A3,NA	CP1?
HD 247157	10303	86.35770	24.07930	10.11	A5,NA	CP1?
HD 247209	10315	86.55050	31.38780	9.40	B9,NA	CP1?
HD 247303	10321	86.64790	31.96550	10.70	A2,NA	CP1?
AAO+30 232	10324	86.66660	30.67430	11.26	A0,NA	CP1?
HD 38478	10350	86.68960	15.82250	5.99	B8,Hg,Mn	CP3	62.5(5.8/2)
AAO+24 196	10335	86.74030	24.52530	12.10	A5,NA	CP1?
HD 38573	10370	86.91020	20.94080	7.40	A-F,NA	CP1
AAO+27 188	10371	86.96450	27.20110	11.88	A2,NA	CP1?
HD 247577	10364	87.00330	32.42450	10.80	A0,NA	CP1?
AAO+27 190	10377	87.00680	27.78450	11.69	A1,NA	CP1?
HD 247634	10383	87.05080	29.76800	9.72	A7,NA	CP1?
AAO+27 196	10395	87.10910	27.26460	11.30	A0,NA	CP1?
BD+29 1003	10397	87.15820	29.44670	11.50	A3,NA	CP1?
AAO+25 209	10421	87.23630	25.81960	11.10	A2,NA	CP1?
HD 247800	10417	87.24920	28.25230	10.00	A5,NA	CP1?
HD 247837	10423	87.27000	26.25600	10.60	A1,NA	CP1?
HD 247961	10431	87.39780	25.70410	9.62	A2,NA	CP1?
HD 247988	10437	87.46870	28.21120	10.50	A0,NA	CP1?
HD 247986	10435	87.48910	30.38140	9.25	A3,NA	CP1?
HD 248069	10448	87.54940	26.71250	10.70	A0,NA	CP1?
AAO+28 255	10445	87.56630	28.51760	10.80	A4,NA	CP1?
HD 38876	10443	87.60440	32.88060	8.85	A3,NA	CP1?
HD 248208	10478	87.71580	29.17630	10.80	A2,NA	CP1?
AAO+31 299	10472	87.72580	31.73100	10.94	A3,NA	CP1?
HD 248171	10473	87.74700	33.01130	10.50	A3,NA	CP1?
HD 248207	10479	87.76920	32.60210	11.20	A7,NA	CP1?
AAO+27 225	10484	87.79480	27.64790	11.12	A3,NA	CP1?
HD 248327	10502	87.82770	23.69930	10.20	A5,NA	CP1?
HD 248246	10483	87.84670	33.09820	10.10	A2,NA	CP1?
HD 248321	10492	87.87370	30.61660	9.65	A2,NA	CP1?
HD 248370	10506	87.94580	29.82460	10.60	A1,NA	CP1?
AAO+30 280	10505	87.95220	30.40750	10.90	B9,NA	CP1?
AAO+28 289	10517	88.08590	28.86090	11.40	A0,NA	CP1?
HD 39226	10522	88.08930	28.63240	8.82	A2,NA	CP1
HD 248526	10532	88.14970	29.60690	10.70	A2,NA	CP1?
AAO+27 236	10536	88.15810	27.82300	11.41	A2,NA	CP1?
HD 248524	10528	88.15810	31.66430	10.40	A5,NA	CP1?
AAO+28 297	10538	88.17830	28.77130	11.00	A3,NA	CP1?
HD 248577	10554	88.23590	30.20290	11.10	A0,NA	CP1?
HD 248672	10574	88.25080	23.99990	10.50	A0,NA	CP1?
HD 248668	10576	88.27570	26.05080	9.33	A1,NA	CP1?
AAO+30 296	10564	88.28900	30.21080	11.19	B9,NA	CP1?
HD 248635	10569	88.29830	29.34550	10.30	A2,NA	CP1?
AAO+24 272	10586	88.32620	24.78450	11.01	A5,NA	CP1?
HD 248688	10578	88.39620	33.23240	10.80	A2,NA	CP1?
HD 248765	10592	88.45320	29.90040	10.80	B9,Sr	CP1?
AAO+29 299	10597	88.50130	29.02010	10.80	B8,Si	CP1?
AAO+27 256	10601	88.52370	27.06360	10.81	A0,NA	CP1?
HD 248874	10602	88.59480	30.90050	10.10	A0,NA	CP1?
AAO+27 261	10606	88.61350	27.72350	10.82	A3,NA	CP1?
HD 248904	10605	88.63680	30.46140	10.00	A0,NA	CP1?
HD 248945	10608	88.64320	27.33380	10.10	A2,NA	CP1?
HD 249105	10626	88.85610	26.17690	9.39	A0,NA	CP1?
HD 249155	10635	88.97170	27.97580	9.51	A0,NA	CP1?
HD 249278	10641	89.12000	29.99230	10.25	A5,NA	CP1?
HD 249456	10667	89.37270	31.68520	9.53	A4,NA	CP1?
AAO+28 366	10687	89.53450	28.88890	11.46	A0,NA	CP1?
HD 40163	10711	89.60020	29.62710	7.90	A0,NA	CP1
HD 249647	10693	89.60810	32.73910	10.70	A0,NA	CP1?
HD 249697	10723	89.63060	27.04280	10.40	A2,NA	CP1?
HD 249808	10748	89.71960	24.09020	10.60	A3,NA	CP1?
HD 40366	10769	89.90260	30.00510	8.47	A3,NA	CP1?
HD 249933	10795	89.91140	27.34900	10.50	A5,NA	CP1?
HD 249890	10772	89.94080	32.42260	10.05	A5,NA	CP1?
HD 249962	10797	89.97910	30.18600	9.30	A5,NA	CP1?
AAO+26 309	10811	90.06110	26.57860	11.04	A0,NA	CP1?
AAO+28 409	10855	90.27330	28.78510	10.96	A0,NA	CP1?
BD+29 1073	10853	90.28820	29.87360	12.10	B9,NA	CP1?
AAO+29 398	10862	90.30570	29.46830	11.26	A3,NA	CP1?
HD 250237	10859	90.33760	32.96390	10.00	A0,NA	CP1?
HD 250259	10864	90.35450	32.18740	9.80	A3,NA	CP1?
HD 250260	10866	90.35850	31.91930	9.56	A3,NA	CP1?
HD 40788	10913	90.53920	23.92980	9.04	A2,NA	CP1?
HD 250513	10914	90.62740	30.92320	9.97	A2,NA	CP1?
AAO+28 439	10916	90.63490	28.01450	11.51	A2,NA	CP1?
HD 250490	10912	90.63520	33.41100	9.75	A1,NA	CP1?
HD 250636	10925	90.75590	30.89590	10.30	A2,NA	CP1?
HD 250635	10927	90.76260	31.25420	10.30	A0,NA	CP1?
HD 250660	10929	90.76850	29.78060	9.84	A3,NA	CP1?
HD 250680	10933	90.83350	33.46490	9.73	A2,NA	CP1?
HD 250681	10937	90.83780	32.26110	9.83	A3,NA	CP1?
HD 250786	10961	90.86510	23.81060	10.40	A5,NA	CP1?
AAO+29 440	10966	90.96470	29.23310	11.00	A3,NA	CP1?
HD 250990	11004	91.10220	25.63630	10.40	A2,NA	CP1?
HD 251038	11007	91.13580	24.99050	10.67	A0,NA	CP1
HD 251010	11005	91.14250	28.65460	10.43	A2,NA	CP1?
HD 251095	11022	91.26410	30.92290	10.80	A2,NA	CP1?
HD 251143	11025	91.28760	29.58320	9.90	A3,NA	CP1?
HD 251227	11032	91.35940	29.03030	10.26	A3,NA	CP1?
HD 251228	11035	91.38570	27.97820	10.80	A2,NA	CP1?
HD 251226	11033	91.40020	31.85560	10.60	A5,NA	CP1?
HD 251522	11095	91.65080	29.51210	10.80	A2,NA	CP1?
AAO+28 524	11098	91.67520	28.55120	11.37	A3,NA	CP1?
HD 251577	11102	91.70450	29.56190	10.18	A5,NA	CP1?
HD 41525	11109	91.79700	32.20000	8.46	A5,NA	CP1?
AAO+30 470	11117	91.94550	30.32630	11.38	A1,NA	CP1?
HD 251836	11118	91.97830	31.76660	10.90	B9,NA	CP1?
HD 251966	11132	92.02170	29.05830	9.13	A1,NA	CP1?
HD 251912	11123	92.02600	31.96090	9.47	A3,NA	CP1?
HD 251963	11135	92.10600	33.29790	10.37	A7,NA	CP1?
HD 252040	11147	92.14480	30.39640	10.60	A3,NA	CP1?
HD 252066	11152	92.19190	33.43690	10.30	A3,NA	CP1?
AAO+29 502	11182	92.29200	29.74080	12.12	A3,NA	CP1?
HD 252679	11274	92.52620	14.26280	9.33	A3-F2,NA	CP1
HD 42155	11265	92.65780	33.44030	9.21	A2,NA	CP1?
HD 252700	11275	92.66560	24.94260	10.60	A2,NA	CP1?
HD 42954	11460	93.61910	17.90640	5.88	A5-A9,NA	CP1	32.5(5.7/2)
GSC 01314-00887	11473	93.63360	16.11460	11.00	A3-F2,NA	CP1
HD 43509	11560	94.37080	20.80740	8.90	A2,NA	CP1
HD 43682	11590	94.54530	15.95210	8.43	A4-F0,NA	CP1
GSC 00744-00733	11876	96.18200	14.32540	11.00	A0-F5,NA	CP1
HD 46825	12570	99.01830	13.69400	7.23	A2-F0,NA	CP1
HD 46796	12550	99.03110	19.55850	8.22	A0,NA	CP1
HD 50635	13910	103.66100	13.17780	4.70	A8-F0,NA	CP1?	147.5(10.5/4)
HD 52828	14490	105.87400	19.22210	7.53	A0,NA	CP1
HD 55822	15190	108.84400	19.06240	8.53	A3-F5,NA	CP1
HD 60178J	16440	113.65000	31.88860	1.59	A0,Sr,Eu	CP1	25.0(0.6/3)
HD 68099	18820	122.81900	9.82123	6.08	B8,Mn,Hg	CP3	60.0(5.3/2)
HD 68725	19060	123.61300	20.70780	6.95	F2-F6,NA	CP1	35.0(5.3/1)
HD 70318	19404	125.47500	17.60110	8.20	A3,NA	CP1
HD 70826	19550	126.20500	20.15300	7.38	A3-F8,NA	CP1	5.0(0.8/1)
HD 71030	19630	126.45800	17.04630	6.10	F3,NA	CP1?	9.0(2.1/2)
HD 72825	20190	128.92999	20.33030	8.27	A0,NA	CP1?
HD 72942	20220	129.07300	20.34150	7.48	A2,NA	CP1?	60.0(9.0/1)
HD 73135	20320	129.32600	18.87000	8.57	A2,NA	CP1
HD 73174	20340	129.40401	19.73290	7.76	A3-F1,NA	CP1	11.1(0.8/2)
HD 73574	20413	129.92799	20.08620	7.75	A6-F0,NA	CP1	105.0(15.8/1)
HD 73618	20450	129.98500	19.55300	7.30	A3-F0,NA	CP1	52.0(12.0/2)
HD 73619	20460	129.99100	19.54150	7.52	A3-F2,NA	CP1	73.1(0.4/2)
HD 73711	20520	130.07500	19.53200	7.51	A2-F1,NA	CP1	60.5(5.8/2)
HD 73709	20510	130.08600	19.68670	7.68	A3-F1,NA	CP1	19.6(0.2/2)
HD 73818	20570	130.23700	19.93490	8.69	A4-F1,NA	CP1	85.0(12.8/1)
HD 74656	20880	131.44400	19.04950	8.04	A0,NA	CP1
GSC 00813-02294	21160	132.76500	11.75080	10.90	A4-F1,NA	CP1
GSC 00814-01911	21170	132.86000	11.73080	11.30	A2-A7,NA	CP1
HD 76310	21390	133.99600	21.69220	8.54	A3-A9,NA	CP1
HD 76756	21640	134.62199	11.85770	4.25	A3-F1,NA	CP1	67.0(5.8/3)
HD 76924	21700	134.99100	26.43450	6.87	A2,NA	CP1
HD 78316	22170	136.93700	10.66820	5.23	B8,Mn,Hg	CP3	9.4(0.0/7)
HR 3649	22420	137.98200	5.46863	6.35	A9,dD	CP1?
HD 81581	23180	141.70100	14.49400	7.79	A4-F1,NA	CP1
HD 83808	23896	145.28799	9.89231	3.53	A4,NA	CP1	13.0(0.1/2)
HD 85216	24340	147.72099	19.32350	8.39	A2-F3,NA	CP1
HD 85931	24530	148.93300	20.97180	8.96	A3-A8,NA	CP1
HD 86516	24750	149.86700	21.32150	6.74	A2,NA	CP1
BD+21 2142	24800	150.33600	20.99750	9.42	A,NA	CP1
HD 87094	24903	150.72200	1.48585	8.67	A2-F2,NA	CP1
HD 87500	25104	151.42101	15.75750	6.37	F0,dD	CP1	177.2(12.0/4)
HD 88021	25190	152.33200	20.33240	6.70	A2-F,NA	CP1
HD 90011	25870	155.86400	2.25390	8.69	F0-F3,NA	CP1
HD 92604	26730	160.42300	10.73950	7.83	A6-F1,NA	CP1
HD 95899	27620	165.99600	3.63869	7.28	A6-F4,dD?	CP1
HD 97244	28046	167.93201	14.40020	6.30	A5-A7,NA	CP1?	80.7(5.8/3)
HD 98575	28390	170.13300	-2.89817	9.10	A1-F2,NA	CP1
HD 103313	29796	178.45900	0.55212	6.31	A7-F1,NA	CP1	66.8(3.6/6)
BD+03 2582	30080	179.86501	2.43725	10.80	A3,NA	CP1?
HD 104788	30320	181.00101	-10.29610	6.60	A2-F1,NA	CP1?
HD 104817	30340	181.05400	1.46204	7.69	A2-A7,NA	CP1
HD 105281	30440	181.84200	-10.73950	8.23	A2-F3,NA	CP1
HD 105702	30590	182.51401	5.80701	5.71	F0-F6,NA	CP1	33.0(10.0/1)
HD 105967	30630	182.91800	4.05591	6.93	A2-F0,NA	CP1
HD 106384	30800	183.56400	-5.71660	6.56	A5-F2,NA	CP1
HD 107259	31060	184.97600	-0.66680	3.89	A4,NA	CP1	13.7(0.5/3)
HD 107923	31280	186.04300	-1.24352	9.67	A0,NA	CP1?
HD 109005	31630	187.90199	-11.07230	7.90	A5-F2,NA	CP1
HD 115488	33360	199.37399	-0.67606	6.35	A7,NA	CP1?	130.0(7.1/2)
HD 116275	33553	200.69000	-13.18650	7.77	A2,NA	CP1
HD 116542	33610	201.07700	1.39973	7.36	A3,NA	CP1
HD 117986	34015	203.60100	-20.45810	9.06	A1-F3,NA	CP1
HD 118209	34076	203.89200	-14.83010	9.43	A3-F3,NA	CP1
HD 118583	34265	204.53999	-19.18870	8.48	A1-F0,NA	CP1
HD 121686	34993	209.31100	-18.44690	9.73	A1-A8,NA	CP1
HD 121698	34996	209.35899	-22.31480	9.62	A4-F2,NA	CP1
HD 124218	35555	213.15100	-19.21710	9.62	A2-F2,NA	CP1
HD 124915	35713	214.08900	-6.62154	6.44	A5-F1,NA	CP1	74.0(7.1/2)
HD 125296	35776	214.69701	-12.58350	9.66	A4-F0,NA	CP1
HD 125337	35800	214.77699	-13.37110	4.52	A2-A7,NA	CP1	28.0(2.7/2)
HD 125379	35820	214.85699	-18.52360	7.30	A3-F2,NA	CP1
HD 126703	36084	216.90500	-20.81060	9.13	A1-F3,NA	CP1
HD 127860	36335	218.60800	-25.27840	9.35	A2-A8,NA	CP1
HD 128258	36464	219.10800	-22.73420	9.72	A2-F2,NA	CP1
HD 128945	36716	220.10100	-20.84800	9.87	A2-F2,NA	CP1
HD 129098	36777	220.35400	-25.83840	9.81	A5-F4,NA	CP1
HD 129394	36884	220.67900	-12.59800	9.54	A1-A9,NA	CP1
HD 129667	36966	221.05200	-15.72250	9.35	A4-F3,NA	CP1
HD 130841	37210	222.72000	-16.04180	2.75	A3-A7,NA	CP1	79.7(6.4/3)
HD 132054	37494	224.39500	-17.93060	9.64	A3-A9,NA	CP1
HD 135232	38377	228.70000	-25.19320	10.07	A4-F2,NA	CP1
HD 135875	38636	229.52200	-19.50220	9.41	A1-F1,NA	CP1
HD 136032	38710	229.78799	-24.26500	7.20	A5-F2,NA	CP1
HD 136760	38864	230.74100	-19.31860	9.84	A3,NA	CP1?
HD 137034	38907	231.14000	-24.37080	8.63	A4-A9,NA	CP1
HD 138105	39300	232.65100	-20.72860	6.20	A3-A8,NA	CP1	25.5(7.1/2)
HD 138791	39540	233.83600	-29.05050	7.69	A1-F0,NA	CP1
HD 140417	39910	236.01801	-15.67280	5.42	A5-F2,NA	CP1	107.7(8.9/3)
HD 140419	39913	236.07401	-24.39540	7.58	A1-F0,NA	CP1
HD 140722	39987	236.55400	-28.06150	6.51	A7-F2,NA	CP1	58.0(10.0/1)
HD 141445	40150	237.55901	-29.42270	9.63	A1-F1,NA	CP1
HD 141595	40204	237.63100	-17.72480	10.60	A4-F1,NA	CP1
HD 141976	40280	238.25700	-30.25120	9.43	A6,NA	CP1?
HD 143115	40550	239.91499	-30.08330	7.18	A2-F0,NA	CP1
HD 143472	40618	240.36099	-25.19850	7.77	A2-F2,NA	CP1
HD 143786	40726	240.80800	-24.66410	8.53	A1-A8,NA	CP1
HD 145877	41296	243.45500	-16.30930	9.92	A2-F0,NA	CP1
HD 145857	41293	243.51700	-24.16520	9.15	A1-A8,NA	CP1
HD 146120	41325	243.86900	-21.58880	9.02	A2-F2,NA	CP1
HD 146236	41340	244.09100	-28.16400	9.10	A1-F2,NA	CP1
HD 147117	41565	245.08400	-12.80930	10.12	A1-F2,NA	CP1
HD 147103	41550	245.12601	-20.11770	7.56	B9-A2,NA	CP1?
HD 148655	42040	247.67500	-29.48310	7.78	A2-F2,NA	CP1
HD 150018	42436	249.75500	-18.52450	9.18	A9-F2,NA	CP1?
HD 150365	42520	250.32800	-18.05950	6.68	A5-F2,NA	CP1
HD 151154	42740	251.72000	-31.45310	7.78	A0-F0,NA	CP1
HD 151533	42860	252.29601	-30.78090	8.92	F5,NA	CP1?
HD 151659	42924	252.43500	-24.64070	6.74	A1-A7,NA	CP1
HD 151867	42960	252.83501	-30.08080	8.25	A1-F0,NA	CP1
HD 189891	52665	300.73199	-15.18720	9.01	A1-A7,NA	CP1
HD 191110	53190	302.13000	-10.06260	6.18	A0,Hg	CP3	0.0(0.1/2)
HD 191404	53304	302.53201	-11.35680	9.20	A1-F2,NA	CP1
HD 192465	53617	303.85100	-9.01127	9.50	A1-F2,NA	CP1?
HD 192626	53704	304.03299	-11.04530	10.30	A3-F3,NA	CP1
HD 192721	53787	304.21201	-14.19730	9.17	A2-F2,NA	CP1
HD 192840	53816	304.37100	-13.96070	8.74	A1-F0,NA	CP1
HD 192972	53873	304.59399	-14.84870	8.55	A4-F3,NA	CP1
HD 193151	53900	304.85699	-20.95080	6.85	A9,NA	CP1
HD 194345	54227	306.37799	-12.05980	9.41	A2-F0,NA	CP1
HD 195278	54429	307.65201	-8.30919	9.74	A3-F2,NA	CP1
HD 195497	54484	308.11600	-23.96610	8.93	A1-F2,NA	CP1
HD 195811	54577	308.54300	-19.28790	8.41	A3-F2,NA	CP1
HD 196100	54656	308.91501	-17.22820	9.11	A3-A9,NA	CP1
HD 196166	54680	309.13101	-26.54130	9.24	A4-F0,NA	CP1
HD 197182	55013	310.60300	-7.91345	9.96	A0-F0,NA	CP1
HD 197889	55100	311.83401	-26.41520	7.27	A1-F0,NA	CP1
HD 198040	55136	312.01700	-9.29624	8.99	A1-A8,NA	CP1
HD 198230	55194	312.33401	-13.04260	9.23	A1-F2,NA	CP1
HD 198409	55233	312.72101	-25.26970	9.94	A2-F3,NA	CP1?
HD 198743	55320	313.16299	-8.98331	4.72	A3-F3,NA	CP1	52.1(3.0/5)
HD 199144	55436	313.93500	-18.58130	8.09	A0-F0,NA	CP1
HD 200052	55700	315.43900	-26.88100	6.04	A2-A7,NA	CP1	35.0(10.0/1)
HD 200277	55777	315.73099	-14.38300	9.52	A1-F3,NA	CP1
HD 200517	55895	316.04901	-11.95970	9.75	A2-A9,NA	CP1
HD 201038	56080	316.85901	-8.23490	6.90	A2-F1,NA	CP1
HD 202149	56350	318.57001	-10.60540	6.76	B9,Hg	CP3	37.5(3.7/2)
HD 202152	56360	318.69000	-25.91130	8.10	A3-F1,NA	CP1
HD 202606	56436	319.30600	-13.27900	6.41	A1-A3,NA	CP1	40.0(10.0/1)
HD 203313	56587	320.52701	-24.22590	9.36	A2-F1,NA	CP1
HD 203683	56710	320.99200	-3.36455	10.05	A0,Si	CP1?
HD 203653	56700	321.06201	-25.56120	7.94	A0-A9,NA	CP1
HD 203843	56760	321.21500	-3.39835	6.39	A9,NA	CP1
HD 203845	56763	321.29401	-16.40210	9.34	A2-A6,NA	CP1
HD 204218	56885	321.85199	-12.25160	9.03	A1-F2,NA	CP1
HD 205244	57190	323.53201	-4.36816	6.69	A6-A9,NA	CP1
HD 205543	57266	324.11200	-16.71050	8.83	A1-F0,NA	CP1
HD 205607	57284	324.18100	-13.45930	8.68	A3-A9,NA	CP1
HD 206561	57490	325.76801	-14.39970	5.88	A4-F2,NA	CP1	81.0(10.0/1)
HD 206546	57480	325.80600	-19.62100	6.22	A2-F0,NA	CP1	34.0(7.1/2)
HD 206677	57520	326.00400	-14.74940	5.96	A4-F0,NA	CP1?	118.0(5.2/3)
HD 207439	57716	327.33301	-18.38650	7.55	A2-A9,NA	CP1?
HD 207503	57730	327.42099	-12.72290	6.31	A2-F2,NA	CP1	51.5(3.2/2)
HD 208208	57886	328.75800	-11.97020	8.06	A1-F4,NA	CP1
HD 209475	58284	331.04099	-21.78000	7.86	A2-F0,NA	CP1
HD 209711	58360	331.34900	0.26114	7.57	A3,NA	CP1?
HD 212144	58865	335.59000	-18.27730	9.90	A4-F2,NA	CP1
HD 212623	58990	336.43900	-0.83434	9.27	A0,NA	CP1	105.0(15.8/1)
HD 212797	59027	336.79999	-19.44320	8.66	A2-F2,NA	CP1
HD 213236	59120	337.57199	-14.58570	6.34	B8,Mn	CP3	40.0(5.8/3)
HD 213464	59200	337.92200	-10.90560	6.38	A7-F2,NA	CP1	30.0(10.0/1)
HD 215413	59510	341.26401	0.28548	10.50	A2,NA	CP1?
HD 215430	59520	341.34100	-14.20960	9.13	A2-F2,NA	CP1
HD 215875	59625	342.14899	-17.25610	8.24	A1-F0,NA	CP1
HD 219200	60250	348.52701	-2.63499	7.20	A2-F2,NA	CP1
HD 221675	60750	353.53799	-1.24757	5.89	A3-F1,NA	CP1	67.5(6.9/2)
HD 222377	60980	354.97900	9.67730	5.98	A2-F0,NA	CP1
