# Supplementary material for: A photometric study of chemically peculiar stars with the STEREO satellites – II. Non-magnetic chemically peculiar stars★
Source: Oxford University Press journal article supplement (doi:10.1093/mnras/sts318), 2012-12-03
Supplement: sts318_Supplementary_Data.zip [file sts318_Supplementary_Data.zip › table2.txt]

HD1651	355	5.20745	-0.87109	9.28	A6-A9,NA	CP1	1.3231	0.0004	W	S11:0.066
BD+0663	720	8.06457	6.92384	9.91	A0,NA	CP1			B
HD9862	2430	24.10950	3.78577	8.66	A2,NA	CP1			C
HD23325	5940	56.27720	24.26350	8.70	A4-F0,NA	CP1			B		75.0(11.3/1)
HD23408	6000	56.45670	24.36780	3.87	B7,He-weak,Mn	CP3			BS		35.8(2.3/4)
HD23924	6126	57.42050	23.34160	8.13	A3-A7,NA	CP1			B		80.0(12.0/1)
HD27045	6910	64.31530	20.57860	4.92	A3-F3,NA	CP1			B		69.0(7.1/2)
HD27429	7046	65.10460	18.74260	6.09	F2,Cr,Sr	CP1?			C		145.0(21.8/1)
GSC02390-01591	8829	79.98280	30.38030	10.70	A3,NA	CP1?	2.3503	0.0012	BW
HD242858	8916	80.49290	29.80600	9.73	A2,NA	CP1?			C
HD243313	9007	81.22380	27.71690	10.07	A1,NA	CP1?	2.5837	0.0021	BW
HD243330	9023	81.25540	27.84810	10.80	A1,NA	CP1?			B
AAO+2916	9054	81.36630	26.99040	10.86	A2,NA	CP1?			C
GSC02403-01195	9055	81.43030	30.74420	10.70	A5,NA	CP1?	6.0118	0.0070	BW
HD243542	9123	81.60870	30.62020	10.05	A3,NA	CP1	1.8063	0.0009	BW	S11:0.039
GSC01859-01122	9137	81.62460	29.05950	11.00	A0,NA	CP1			B
HD243831	9232	81.98840	27.50820	10.00	A0,NA	CP1			C
HD243873	9238	82.13100	31.48880	9.90	A5,NA	CP1			C
BD+22918	9258	82.22790	22.70400	10.04	A2,NA	CP1?			B
AAO+2344	9318	82.52350	23.67150	10.88	A5,NA	CP1?			B
HD244168	9295	82.60550	33.44440	10.80	A1,NA	CP1?			B
AAO+29106	9325	82.62590	29.91810	11.70	A2,NA	CP1?			C
BD+24842	9342	82.67300	24.97390	11.40	A2,NA	CP1?			C
BD+22935	9397	83.07070	22.84510	10.85	A2,NA	CP1?			C
HD244709	9458	83.29810	23.22730	10.05	A3,NA	CP1?			C
HD244697	9451	83.30300	26.52920	10.21	A0,NA	CP1?			C
AAO+29132	9555	83.64190	29.28550	11.16	A2,NA	CP1?			C
HD245224	9701	84.01720	24.52310	10.26	A2,NA	CP1?			B
HD245323	9829	84.15730	25.15420	9.61	A0,NA	CP1?			C
GSC01861-00459	9885	84.29440	24.07220	11.40	A5,NA	CP1?			C
HD245989	10085	85.01130	26.90310	10.32	A3,NA	CP1?	3.6495	0.0041	BW
HD246289	10164	85.48100	32.48250	9.41	A2,NA	CP1?			B
HD246562	10221	85.71090	27.01060	9.58	A2,NA	CP1?	2.3156	0.0015	BW
HD246748	10235	85.89450	24.92370	9.95	A0,NA	CP1?			C
AAO+26165	10238	85.97850	26.73600	11.22	A5,NA	CP1?			C
HD246933	10244	86.15370	26.96910	10.40	A2,NA	CP1?			B
HD247015	10271	86.27680	28.44880	10.90	A0,NA	CP1?			C
HD38180	10260	86.29020	28.25270	8.43	A3,NA	CP1			B
HD247331	10322	86.57750	25.59150	9.01	A1,NA	CP1?			B
HD247582	10366	86.89910	23.64720	9.80	A2,NA	CP1?			B
GSC01874-00849	10389	87.06470	28.30790	10.60	A3,NA	CP1?	1.3382	0.0004	BW
GSC01862-01799	10439	87.43160	24.18390	10.80	A2,NA	CP1?			B
GSC01862-01946	10474	87.63480	23.92130	10.80	A2,NA	CP1?			B	S11:0.055
GSC01874-00718	10477	87.71160	29.71700	11.20	A1,NA	CP1?			B
HD248211	10481	87.73540	28.11870	10.13	A2,NA	CP1?			C
AAO+24242	10496	87.79750	24.13240	11.42	A5,NA	CP1?			C
AAO+24245	10503	87.85370	24.26440	11.15	A3,NA	CP1?	2.0279	0.0011	W
HD248532	10534	88.08880	24.01300	10.60	A1,NA	CP1?			B
HD248637	10565	88.22800	24.96660	10.40	A2,NA	CP1?			C	S11:0.080
HD248855	10599	88.48490	25.45120	10.20	A2,NA	CP1?			B
HD249041	10614	88.72340	25.09590	10.03	A5,NA	CP1?			C
GSC01875-02197	10616	88.78760	28.24660	10.60	A1,NA	CP1?			B
AAO+27275	10631	88.89180	27.20700	11.37	A0,NA	CP1?	1.4272	0.0006	BW
HD249218	10636	89.02380	29.01930	9.46	A0,NA	CP1?			B
AAO+29325	10637	89.06420	29.11570	10.89	A3,NA	CP1?			C
AAO+27298	10665	89.29640	27.90950	11.21	A0,NA	CP1?			B
HD249481	10671	89.32840	26.22300	9.98	A1,NA	CP1?			B
HD249570	10682	89.40600	23.70000	10.80	A2,NA	CP1?			C
GSC01871-00027	10713	89.56500	26.27860	10.34	A2,NA	CP1?			C
AAO+27332	10747	89.75990	27.50690	8.99	A0,NA	CP1?			B
AAO+28380	10746	89.77140	28.93460	11.27	A1,NA	CP1?			B
HD249991	10803	89.91600	22.62540	10.96	A0,NA	CP1?	3.8089	0.0032	BW
HD249889	10765	89.93490	33.50700	10.11	A2,NA	CP1?	7.0668	0.0134	W
AAO+29384	10809	90.05430	29.27390	11.60	A3,NA	CP1?	1.7539	0.0016	BW
HD40653	10874	90.35540	29.57740	8.43	A2,NA	CP1	5.9366	0.0184	BW
HD250408	10883	90.44320	23.66230	10.90	A2,NA	CP1?			B
HD250422	10889	90.50160	27.20210	10.07	A2,NA	CP1?			C
HD250443	10892	90.57140	32.19540	9.35	A3,NA	CP1?			C
HD250595	10919	90.66040	26.17110	9.43	A2,NA	CP1?			B
HD250687	10935	90.73140	24.44850	10.80	A3,NA	CP1			C
HD250751	10955	90.89920	29.58450	10.27	A0,NA	CP1?			B
HD251071	11009	91.14520	24.00660	10.28	A3,NA	CP1?			C
GSC01868-02652	11008	91.14990	25.09530	11.76	A0,NA	CP1?			B
HD251150	11024	91.20660	23.31800	10.50	A0,NA	CP1?			B
GSC01872-00982	11021	91.20760	27.10340	10.70	A2,NA	CP1?			B
HD251251	11034	91.37980	29.12920	10.36	A4,NA	CP1?			B
HD251618	11107	91.69670	24.98260	10.20	A2,NA	CP1?			B
GSC01864-01364	11108	91.70180	23.21850	11.86	A0,NA	CP1?			C
HD251616	11106	91.73280	27.97500	11.00	A0,NA	CP1?			B
HD251944	11128	91.94580	24.19260	9.55	A0,NA	CP1?			B
AAO+28550	11142	92.08860	28.08040	11.19	A1,NA	CP1?	1.1274	0.0004	BW
AAO+28554	11175	92.16800	28.27180	11.64	A1,NA	CP1?			C
HD252154	11184	92.22220	23.80780	9.83	A5,NA	CP1?	3.1482	0.0032	BW	S11:0.688
HD252405	11190	92.36440	24.24350	8.78	B8,NA	CP1?			B
AAO+24459	11252	92.49970	24.91360	10.96	A2,NA	CP1?	1.0419	0.0002	W
HD43561	11570	94.42740	20.44190	8.53	A2,NA	CP1			B
HD44092	11700	95.29970	29.54080	6.40	A0,NA	CP1	3.5525	0.0030	W		50.0(5.7/2)
HD258184	12160	97.52640	29.53640	9.35	A2-F2,NA	CP1	0.8416	0.0002	W
HD50186	13710	103.27600	25.31150	7.40	A2-A9,Sr	CP1			C
HD51688	14230	104.86600	25.91420	6.39	B8,Si,Mn	CP3			B		45.0(3.7/2)
HD56484	15423	109.47000	19.54710	8.43	A2-F0,NA	CP1?			B	S11:0.067
BD+231695	15730	110.78700	22.82110	8.98	A,NA	CP1?			C
HD72357	20025	128.28900	21.87590	9.00	A2,NA	CP1			C
HD73730	20540	130.09801	19.83500	7.99	A3-F2,NA	CP1			B		32.2(3.2/2)
HD73731	20550	130.11301	19.54480	6.29	A3-F0,dD	CP1			B		49.2(0.6/3)
HD76364	21450	134.09801	21.85940	9.28	A2,NA	CP1			C
HD95190	27400	164.88800	9.93079	7.27	A3-F2,NA	CP1	9.5787	0.0323	W
HD120025	34600	206.80499	-19.25580	6.71	A2-F3,NA	CP1	3.4810	0.0035	BSW
HD120727	34764	207.89000	-18.35710	8.54	A1-F0,NA	CP1			B
HD124275	35574	213.22701	-14.17240	8.88	A2-F0,NA	CP1			C
HD125125	35744	214.42700	-8.76019	10.15	A3-F2,NA	CP1			C
HD126214	35974	216.15800	-14.71350	7.93	A2-F3,NA	CP1			B
HD135485	38490	228.93900	-14.69290	8.13	B5,Ti,N,Mn	CP3			CS		0.0(2.1/1)
HD138413	39410	233.15300	-19.67050	5.52	A2-F1,NA	CP1	0.2914	0.0001	BSW		35.5(3.2/2)
HD146053	41315	243.75200	-20.04720	10.09	A6-F3,NA	CP1			B	S11:0.101
HD150736	42654	250.98100	-25.28330	10.08	A1-F0,NA	CP1	1.3121	0.0005	BW
HD191971	53516	303.32199	-22.05960	9.16	A6-F3,NA	CP1			B
HD192666	53720	304.09500	-12.33710	6.30	B9,Hg	CP3?			B		100.0(15.0/1)
HD193452	54010	305.19400	-14.78490	6.10	B9,Hg,Pt,Sr	CP3?			B		2.2(0.1/4)
HD194142	54185	306.17899	-24.25550	9.01	A1-A9,NA	CP1			C
HD194623	54280	306.89499	-26.20330	8.71	F2,Sr	CP1			B
HD197354	55016	310.93900	-20.51370	9.85	A0-F0,NA	CP1			C
HD204972	57104	323.16299	-21.77650	8.74	A2-F2,NA	CP1			CS	S11:0.072
HD211813	58795	335.03601	-15.28320	9.68	A1-F0,Sr	CP1	2.1666	0.0035	W
HD216931	59880	344.27899	-3.24522	6.62	A0,NA	CP1			C		73.0(4.0/1)
