# Supplementary material for: A photometric study of chemically peculiar stars with the STEREO satellites – II. Non-magnetic chemically peculiar stars★
Source: Oxford University Press journal article supplement (doi:10.1093/mnras/sts318), 2012-12-03
Supplement: sts318_Supplementary_Data.zip [file sts318_Supplementary_Data.zip › table3.txt]

HD 2523	600	7.28586	11.32020	8.10	A8-F2,NA	CP1	0.5668	0.0001	54167.607	B			7050(-/1)	0.77(0.11)	1.51(0.06)	0.37(0.29)
HD 7374	1850	18.53180	16.13350	5.97	B9,Si,Hg,Mn	CP3	2.8240	0.0019	54187.360	B	C98:2.8	24.2(0.8/4)	12811(68/4)	2.18(0.10)	3.40(0.15)	0.31(0.25)
HD 21437	5350	52.00580	20.46430	6.89	A3-F3,NA	CP1	0.7981	0.0002	54208.748	B
HD 23607	6050	56.83060	24.13910	8.28	A4-F2,NA	CP1	1.8526	0.0007	54213.398	BS	S09+W:0.047	10.0(1.5/1)	7981(91/3)		2.16(0.45)
HD 23950	6130	57.47950	22.24410	6.07	B9,Si,Hg,Mn	CP3	3.2509	0.0020	54216.059	B	C98:1.1	82.5(3.8/4)	12504(245/4)	1.97(0.11)	3.11(0.17)	0.03(0.18)
HD 27628	7080	65.51470	14.07720	5.72	A3-F2,NA	CP1	1.0718	0.0003	54220.184	S	S09+W:0.0625	29.5(5.0/4)	7210(90/99)	0.90(0.05)	1.60(0.04)	0.49(0.13)
HD 28929	7400	68.65830	28.96110	5.89	B8,Hg,Mn	CP3	1.9773	0.0009	54226.963	B*		60.0(3.5/3)	12673(106/4)	2.30(0.09)	3.52(0.14)	0.53(0.18)
HD 31592	8066	74.53910	25.05040	5.81	B9-A2,NA	CP1	0.8679	0.0002	54228.493	B*		120.0(18.0/1)	9907(105/3)	1.56(0.06)	2.37(0.05)	0.30(0.13)
BD+23 926s	9353	82.77300	23.21780	10.19	A5,NA	CP1?	0.9389	0.0003	54236.168	B	S09+W:0.9426
HD 244698	9454	83.29710	24.11810	10.34	A2,NA	CP1?	0.9993	0.0004	54236.593	B	S11:0.0339
HD 37683	10158	85.41090	28.45670	8.09	A2,NA	CP1	3.2739	0.0023	54238.497
HD 37752	10180	85.47820	23.32620	6.58	B8,He-weak,Hg	CP3	1.3049	0.0006	54238.583	B			14876(78/4)	2.65(0.15)	4.40(0.25)	0.49(0.24)
HD 246709	10234	85.90630	28.19120	10.38	A3,NA	CP1?	1.6175	0.0008	54238.570	B
HD 247696	10393	87.08320	27.00410	9.25	A2,NA	CP1?	2.5673	0.0013	54239.754
HD 248052	10441	87.47770	24.93000	10.59	A0,NA	CP1?	1.0176	0.0003	54240.535	B
HD 39078	10499	87.82110	23.92630	8.52	A1,NA	CP1?	0.9913	0.0004	54240.527	B			8489(15/50)	1.17(0.23)	1.90(0.15)	0.27(0.30)
AAO+23 222	10508	87.88550	23.73550	11.50	A0,NA	CP1?	0.9911	0.0003	54240.512	B
AAO+25 242	10511	87.95740	25.33700	11.73	A0,NA	CP1?	1.1202	0.0004	54240.836	B
GSC 02406-01881	10689	89.56440	30.52990	10.37	A2,NA	CP1?	0.5419	0.0001	54241.624	B
BD+27 937	10745	89.74970	27.31490	9.97	A1,NA	CP1?	1.1164	0.0003	54242.091	B
AAO+28 487	11027	91.29930	28.98370	11.72	A0,NA	CP1?	1.8278	0.0010	54242.924	S
HD 251382	11075	91.49360	26.60980	10.40	A1,NA	CP1	1.1818	0.0004		BW
HD 252100	11155	92.14370	29.01840	9.50	A0,NA	CP1?	2.6343	0.0010	54244.200	BS
HD 42066	11198	92.43070	24.14520	8.67	A2,NA	CP1?	2.1025	0.0009	54245.215	B			8606(150/50)		2.35(0.47)
							0.9911	0.0195
HD 253252	11387	93.07140	14.94480	10.22	A4-F1,NA	CP1	0.4055	0.0001	54244.554	B*
HD 49606	13440	102.45800	16.20290	5.87	B8,Mn,Hg,Si	CP3	2.2661	0.0024	54254.496	B	C01:3.35/B:1.10503	29.0(1.7/3)	13500(-/99)	2.80(0.14)	4.45(0.28)	0.84(0.11)
HD 56152	15290	109.20200	24.53630	7.32	A1-A2,NA	CP1	1.2612	0.0004	54259.435	B			9279(312/50)	1.46(0.24)	2.21(0.20)	0.41(0.34)
							3.1645
HD 73045	20280	129.20000	18.88280	8.63	A3-F5,NA	CP1	1.2499	0.0006	54277.647	B		12.1(1.1/2)	7581(186/3)	1.18(0.21)	1.83(0.17)	0.65(0.21)
HD 76543	21576	134.31200	15.32280	5.18	A3-F0,NA	CP1	0.4592	0.0001	54281.914			89.3(7.6/3)	8348(22/3)	1.14(0.05)	1.87(0.04)	0.29(0.13)
HD 85040	24280	147.45900	21.17940	6.10	A7,NA	CP1	2.0735	0.0010	54293.176	*	S09+W:0.08184505	89.0(7.1/2)	7644(198/3)	2.02(0.13/T)	2.59(0.10)	1(0)
							0.0834
							0.0881
HD 104321	30187	180.21800	6.61432	4.66	A4-A7,NA	CP1	1.9469	0.0012	54325.915	B*		67.3(5.8/3)	8312(348/3)	2.17(0.07/T)	2.84(0.09)	1(0)
HD 109532	31770	188.86200	-9.43422	9.38	A2-F0,NA	CP1?	1.1775	0.0006	54338.929	B
HD 122911	35220	211.20300	-6.55242	7.83	A7-F2,NA	CP1	1.0731	0.0004	54357.396	B		45.4(3.5/2)	6862(-/1)	1.25(0.19)	1.86(0.18)	0.90(0.10)
							0.5736
HD 138124	39305	232.68900	-22.19030	8.72	A2-F3,NA	CP1	1.1998	0.0004	54381.570	S			7143(202/50)	1.37(0.31)	1.99(0.28)	0.89(0.16)
							5.8309
HD 138821	39553	233.79700	-21.00780	8.77	A0-A8,NA	CP1	1.1714	0.0004	54381.492	B*			7498(351/50)	0.84(0.24)	1.60(0.12)	0.18(0.29)
HD 139202	39636	234.38000	-22.11700	6.97	A0-F0,NA	CP1	1.4938	0.0006	54382.066	B			7875(177/50)	1.40(0.10)	2.05(0.09)	0.76(0.08)
HD 144844	41040	242.18201	-23.68540	5.87	B9,Mn,P,Ga	CP3	2.6900	0.0026	54390.038	B		45.0(1.5/4)	12430(460/99)	2.28(0.09)	3.46(0.14)	0.57(0.16)
						CP3	0.2771
HD 150366	42530	250.40100	-24.46800	6.07	A4-A9,Sr	CP1	2.5165	0.0023	54399.646	B		34.0(3.2/2)	7971(195/3)	1.37(0.06)	2.03(0.05)	0.71(0.08)
HD 198174	55160	312.32300	-25.78120	5.86	B7	CP3	2.5445	0.0022	54451.244	*		65.0(9.8/1)	13217(341/4)	2.95(0.15)	4.73(0.29)	0.94(0.07)
HD 199366	55564	314.29901	-16.17350	8.92	A2-F2	CP1	1.0648	0.0004	54108.196	B			7006(-/1)		1.82(0.37)
HD 199443	55580	314.41901	-16.03150	5.88	A3-F3	CP1	0.2220	0.00003	54453.867	B		81.5(7.1/2)	8109(45/3)	1.02(0.05)	1.77(0.04)	0.17(0.16)
HD 202671	56480	319.48901	-17.98510	5.40	B7,He-weak,Mn	CP3	1.9917	0.0013	54121.823			26.7(1.7/3)	13150(70/99)	2.56(0.09)	3.98(0.16)	0.72(0.12)
							0.4504
							1.2120
HD 211838	58800	335.04999	-7.82111	5.35	B8,Mn,Hg	CP3	6.5633	0.0063	54129.934	B		65.0(6.9/2)	12454(152/4)	3.01(0.13/T)	4.63(0.25)	1(0)
							0.2211
HD 216494	59790	343.37000	-11.61650	5.80	B9,Hg,Mn	CP3	3.5892	0.0064	54138.905	B	S:3.4	11.4(0.1/5)	11865(30/4)	2.66(0.13)	4.01(0.24)	0.93(0.08)
